# Supplementary material for: Contemporary Clinical and Molecular Epidemiology of Vancomycin-Resistant Enterococcal Bacteremia: A Prospective Multicenter Cohort Study (VENOUS I)
Source: PubMed Central journal article supplement — Open Forum Infect Dis. 2021 Dec 23;9(3):ofab616. doi: 10.1093/ofid/ofab616 (PMC8830530; doi:10.1093/ofid/ofab616), 2021-12-23
Supplement: ofab616_suppl_supplementary_material.pdf [file ofab616_suppl_supplementary_material.pdf]

## Supplemental Online Content

### DNA sequencing, phylogenetic analyses, SNP determination, and enterococcal resistomes

#### Sample processing and sequencing

Genomic DNA was isolated with the QIAGEN QIAamp Mini Kit (Maryland, USA), and library preparation was performed using the Nextera DNA Flex Library Prep Kit (California, USA) with unique barcodes. Pooled isolates were sequenced with an Illumina MiSeq using 2x300 paired-end reads or an Illumina HiSeq 4000 with 2x150 paired-end reads. Sequencing data were processed and adapters and low-quality bases were trimmed with Trimmomatic<sup>1</sup> v0.36.1. Trimmed data were assembled using SPAdes<sup>2</sup> v3.11.12, and assembled contigs shorter than 500 bases were removed using a custom script.

#### Phylogenetic analysis

Genomes were annotated with Prokka<sup>3</sup> v1.14.5 to create GFF files. These were used to create core genome alignments with MAFFT<sup>4</sup> using Roary<sup>5</sup> v 3.13.0 with default parameters. Separate midpoint-rooted maximum-likelihood phylogenetic trees based on core genome alignment were created for *E. faecalis* and *E. faecium* using RAxML<sup>6</sup> v8.2.12 with 100 bootstrap iterations. Clade A and Clade B reference genomes (AUS004 and Com15, respectively) were included in the *E. faecium* tree to aid in determination of cladal division. Trees were visualized using iTOL<sup>7</sup>.

To determine relatedness and potential transmission events for *E. faecium* Clade A isolates, a SNP alignment was created with snp-dists (<https://github.com/tseemann/snp-dists>) using the core gene alignment from Roary, disregarding recombination events and non-coding sequences. A subtype was defined as organisms differing by < 20 single nucleotides, as confirmed by core gene alignment.<sup>8</sup> The heat map for visualization of the SNP matrix output from snp-dists was created with iTOL.

#### Resistome

Acquired resistance elements were searched with BLASTX<sup>9</sup> against the ResFinder database<sup>10</sup>. Hits were selected if they had an identity percentage higher or equal to 95% and a coverage of at least 80% of the target sequence. We determined fluoroquinolone resistance by identifying amino acid substitutions in GyrA (Ser83Ile/Arg, Glu87Gly for *E. faecalis* and Ser84Tyr/Leu/Ile/Arg and Glu88Lys/Gly for *E. faecium*, NCBI accession numbers: NP\_813819.1, YP\_006374612.1, respectively) in GyrB (Glu474Lys for *E. faecium* only. Accession: YP\_006374611.1) and ParC (Ser80Arg/Ile and Glu84Lys for *E. faecalis* and Ser80Arg/Ile and Glu84Lys/Thr for *E. faecium*. Accessions: NP\_815327.1, YP\_006375753.1, respectively)<sup>11, 12</sup>. We investigated linezolid resistance associated mutation G2576T in genes encoding 23S rRNA (GenID 13001435 for *E. faecium* and 1199161 for *E. faecalis*)<sup>13</sup>. Changes in protein L3 (substitutions between residues 127-174. Accession: AAO80075.1 for *E. faecalis* and AFK57681.1 for *E. faecium*) and L4 (substitutions between residues 65-72. Accession: AAO80076.1 for *E. faecalis* and AFK57682.1 for *E. faecium*) were also included<sup>14</sup>. Daptomycin (DAP) non-susceptibility was predicted by the identification of amino acid substitutions in LiaS (Thr120Ala. Accession: YP\_006375543.1), LiaR (Trp73Cys. Accession: YP\_006375544.1) and CIs (Asn13Ile, His215Arg, Arg218Gln, Asn237Asp, and Glu278Gln. Accession: YP\_006375674.1) for *E. faecium*<sup>15, 16</sup>. Similarly, deletion of Ile117 in LiaF (Accession: AEA94900.1) and deletion of Lys61 in CIs (Accession: WP\_002413481.1) for *E. faecalis* associated with DAP non-susceptibility<sup>17</sup> were identified. Prediction of ampicillin resistance for *E. faecium* was obtained using an artificial intelligence model<sup>18</sup> based on the sequence of the PBP5 S/R profiles<sup>19</sup>. The approach uses Random Forest over 100 decision trees trained with 42 genomes of isolates with known MIC to ampicillin (ranging MICs between 0.25-128 µg/ml) and tested on 208 genomes with different susceptibility profiles, obtaining predictions with 100% specificity and 96% sensitivity. The false negatives included 6 cases where the isolates were resistant but predicted to be susceptible<sup>18</sup>.

#### Sensitivity analysis

We used an inverse probability weighing (IPW) Cox analysis to evaluate the association of VRE with hospital mortality using the inverse of the propensity score as weights. We built a multivariate logistic

regression model for propensity score for VRE including age (continuous), sex (yes or no), history of previous hospitalization in the last year (yes or no), hospital unit of admission (ICU, Non-ICU), Charlson score (continuous) and history of bone marrow transplant (yes or no), neutrophil count < 500 cells/ml (yes or no) and history of living in nursing house facility (yes or no). From the estimated propensity score, we calculated the weights as  $1/(\text{propensity score})$  for the VRE group and  $1/(1 - \text{propensity score})$  for the VSE group. Extreme weights were trimmed by setting them to 10 (if >10) or 0.1 (if < 0.1). An IPW Cox regression model was used including VRE, Pitt bacteremia score, microbiological failure and urinary catheter as covariates, stratified by unit of admission and with robust SEs to account for institution. This analysis was also performed at 4, 7, 12, and 15 days after the index culture.

**Table S1. Variables used to create propensity score**

| <b>Variables</b>                                       |
|--------------------------------------------------------|
| Age; years old median (IQR)                            |
| Gender, male (yes/no)                                  |
| Intensive care unit admission (yes/no)                 |
| Reason of admission – medical (yes/no)                 |
| Length of hospitalization; days median (IQR)           |
| Charlson comorbidity index; median (IQR)               |
| Previous hospitalization within 1 year (yes/no)        |
| Nursing home/Long term facility (yes/no)               |
| Neutropenia, defined as <500 cells/microlitre (yes/no) |

**Table S2 Antibiotic resistance genes**

| Gene name                     | Predicted product                     | Antibiotic Class | Comments                                                                                                      |
|-------------------------------|---------------------------------------|------------------|---------------------------------------------------------------------------------------------------------------|
| <i>gyrA</i>                   | GyrA (DNA gyrase A subunit)           | Fluoroquinolones | Ser83Ile/Arg, Glu87Gly for <i>E. faecalis</i> and Ser84Tyr/Leu/Ile/Arg and Glu88Lys/Gly for <i>E. faecium</i> |
| <i>gyrB</i>                   | GyrA (DNA gyrase B subunit)           | Fluoroquinolones | Glu474Lys for <i>E. faecium</i> only                                                                          |
| <i>parC</i>                   | Topoisomerase IV subunit C            | Fluoroquinolones | Ser80Arg/Ile and Glu84Lys for <i>E. faecalis</i> and Ser80Arg/Ile and Glu84Lys/Thr for <i>E. faecium</i>      |
| 23s rRNA                      |                                       | Oxazolidinones   | G2589T in <i>E. faecium</i> and G2587T in <i>E. faecalis</i>                                                  |
| <i>rpIC</i>                   | L3 ribosomal protein                  | Oxazolidinones   | Substitutions between residues 127-174 in both <i>E. faecium</i> and <i>E. faecalis</i>                       |
| <i>rpID</i>                   | L4 ribosomal protein                  | Oxazolidinones   | Substitutions between residues 65-72 in both <i>E. faecium</i> and <i>E. faecalis</i>                         |
| <i>liaF</i>                   | LiaF                                  | Daptomycin       | Deletion of Ile177 in <i>E. faecalis</i>                                                                      |
| <i>liaS</i>                   | LiaS                                  | Daptomycin       | Thr120Ala substitution in <i>E. faecium</i>                                                                   |
| <i>liaR</i>                   | LiaR                                  | Daptomycin       | Trp73Cys substitution in <i>E. faecium</i>                                                                    |
| <i>cls</i>                    | Cardiolipin synthase CLS              | Daptomycin       | Deletion of Lys61 in <i>E. faecalis</i>                                                                       |
| <i>pbp5</i>                   | Penicillin binding protein 5 (PBP5)   | Penicillins      | S/R profiles for <i>E. faecium</i>                                                                            |
| <i>vanA</i>                   | D-Ala-D-Lac ligase                    | Glycopeptides    |                                                                                                               |
| <i>aadK</i>                   | Aminoglycoside nucleotidyltransferase | Aminoglycosides  |                                                                                                               |
| <i>aac(6')-Ie-aph(2'')-Ia</i> | Aminoglycoside acetyltransferase      | Aminoglycosides  |                                                                                                               |
| <i>ant(6)-Ia</i>              | Aminoglycoside nucleotidyltransferase | Aminoglycosides  |                                                                                                               |
| <i>aph(2'')-Ic</i>            | Aminoglycoside phosphotransferase     | Aminoglycosides  |                                                                                                               |
| <i>aph(3'')-III</i>           | Aminoglycoside phosphotransferase     | Aminoglycosides  |                                                                                                               |
| <i>aadD</i>                   | Aminoglycoside nucleotidyltransferase | Aminoglycosides  |                                                                                                               |
| <i>spc</i>                    | Aminoglycoside nucleotidyltransferase | Aminoglycosides  |                                                                                                               |
| <i>cfrB</i>                   | 23S ribosomal RNA methyltransferase   | Oxazolidinones   |                                                                                                               |
| <i>ermA</i>                   | 23S ribosomal RNA methyltransferase   | MLS <sub>B</sub> |                                                                                                               |
| <i>ermB</i>                   | 23S ribosomal RNA methyltransferase   | MLS <sub>B</sub> |                                                                                                               |
| <i>ermT</i>                   | 23S ribosomal RNA methyltransferase   | MLS <sub>B</sub> |                                                                                                               |
| <i>InuB</i>                   | Lincosamide nucleotidyltransferase    | MLS <sub>B</sub> |                                                                                                               |
| <i>IsaA</i>                   | ABC-F ribosomal protection protein    | MLS <sub>B</sub> |                                                                                                               |
| <i>mefA</i>                   | ABC-F ribosomal protection protein    | MLS <sub>B</sub> |                                                                                                               |

|                    |                                    |                  |  |
|--------------------|------------------------------------|------------------|--|
| <i>msrC</i>        | ABC-F ribosomal protection protein | MLS <sub>B</sub> |  |
| <i>cat</i> (pC221) | Chloramphenicol acetyltransferase  | Chloramphenicol  |  |
| <i>cat</i>         | Chloramphenicol acetyltransferase  | Chloramphenicol  |  |
| <i>dfrG</i>        | Dihydrofolate reductase            | Trimethoprim     |  |
| <i>tetL</i>        | Tetracycline efflux protein        | Tetracyclines    |  |
| <i>tetM</i>        | Ribosomal protection protein       | Tetracyclines    |  |
| <i>tetS</i>        | Ribosomal protection protein       | Tetracyclines    |  |

**Table S3. Estimated hazard ratios (HR) of in-hospital mortality when fitting an univariable and multivariate cox regression model.**

| Variable                                       | Unadjusted |            |         | Adjusted conventional §‡ |           |         |
|------------------------------------------------|------------|------------|---------|--------------------------|-----------|---------|
|                                                | HR         | 95% CI     | p value | HR                       | 95% CI    | p value |
| Age; (years)                                   | 0.99       | 0.97-1     | 0.172   |                          |           |         |
| Sex; Male                                      | 1.2        | 0.64-2.26  | 0.577   |                          |           |         |
| Intensive care unit                            | 2.22       | 1.20-4.09  | 0.012   |                          |           |         |
| Reason for admission (Medical)                 | 2.4        | 0.57-10.14 | 0.23    |                          |           |         |
| Length of hospitalization (days)               | 0.99       | 0.97-1.00  | 0.082   |                          |           |         |
| Charlson score                                 | 0.93       | 0.80-1.08  | 0.328   |                          |           |         |
| Bone marrow transplant                         | 1.24       | 0.59-2.62  | 0.571   |                          |           |         |
| Immunosuppressive therapy                      | 0.9        | 0.49-1.68  | 0.744   |                          |           |         |
| Previous hospitalization within a year         | 1.43       | 0.66-3.10  | 0.365   |                          |           |         |
| Nursing home/long term facility                | 0.43       | 0.06-3.16  | 0.409   |                          |           |         |
| Hemodialysis                                   | 1.15       | 0.56-2.42  | 0.663   |                          |           |         |
| Recent surgical procedure                      | 0.79       | 0.27-2.32  | 0.675   |                          |           |         |
| Steroid use                                    | 1.63       | 0.84-3.15  | 0.15    |                          |           |         |
| Pitt bacteremia score $\geq 2$                 | 2.72       | 1.52-5.14  | 0.001   | 1.83                     | 1.47-2.28 | <0.001  |
| Neutropenia, defined as <500 cells/microlitre  | 2.78       | 1.50-5.14  | 0.001   | 3.13                     | 2.89-3.39 | <0.001  |
| Central line placement                         | 2.25       | 1.09-4.61  | 0.028   |                          |           |         |
| Urinary catheter                               | 2.17       | 1.17-4.02  | 0.014   | 1.85                     | 1.17-2.93 | 0.009   |
| Mechanical ventilation                         | 3.15       | 1.60-6.10  | 0.001   |                          |           |         |
| Polymicrobial infection                        | 1.66       | 0.84-3.30  | 0.144   |                          |           |         |
| VRE BSI                                        | 2.21       | 1.20-4.10  | 0.011   | 2.13                     | 1.54-2.93 | <0.001  |
| Infectious diseases Consult $\infty$           | 1.96       | 0.60-6.38  | 0.261   |                          |           |         |
| Central line infection                         | 1.11       | 0.57-2.13  | 0.765   |                          |           |         |
| Abdominal/gastrointestinal infection           | 0.94       | 0.45-1.98  | 0.879   |                          |           |         |
| Unknown/primary source                         | 1.06       | 0.56-1.99  | 0.853   |                          |           |         |
| $\beta$ -lactams†                              | 0.51       | 0.22-1.22  | 0.131   |                          |           |         |
| Daptomycin monotherapy                         | 1.09       | 0.56-2.11  | 0.797   |                          |           |         |
| Daptomycin monotherapy dose (mg/kg;continuous) | 0.91       | 0.76-1.09  | 0.289   |                          |           |         |
| Daptomycin plus other antibiotics              | 1.39       | 0.64-3.01  | 0.407   |                          |           |         |
| BSI recurrence                                 | 1.02       | 0.39-2.70  | 0.962   |                          |           |         |
| Microbiological failure                        | 2.34       | 1.22-4.47  | 0.01    | 2.4                      | 1.34-4.31 | 0.003   |

§ Inclusion of variables in the adjusted model were determined through purposeful variable selection. ‡A hospital

specific random effect intercept was included in the model and were stratified by hospital unit of admission

**Table S4 Evaluation the interaction between VRE and microbiological failure on in-hospital mortality**

| Variables                                  | HR          | 0.95 (CI)        | p value*    |
|--------------------------------------------|-------------|------------------|-------------|
| VRE                                        | 3.57        | 1.23-10.38       | 0.019       |
| Microbiological failure                    | 1.70        | 0.66-4.36        | 0.268       |
| <b>Microbiological failure / VRE (0:1)</b> | <b>0.49</b> | <b>0.13-1.83</b> | <b>0.29</b> |
|                                            | HR          | 0.95 (CI)        | p value     |
| VRE                                        | 1.76        | 0.83-3.76        | 0.141       |
| Microbiological failure                    | 3.45        | 1.38-8.62        | 0.008       |
| <b>Microbiological failure / VRE (1:0)</b> | <b>0.49</b> | <b>0.13-1.83</b> | <b>0.29</b> |
|                                            | HR          | 0.95 (CI)        | p value     |
| VRE                                        | 1.76        | 0.83-3.76        | 0.141       |
| Microbiological failure                    | 1.70        | 0.66-4.36        | 0.268       |
| <b>Microbiological failure / VRE (1:1)</b> | <b>2.03</b> | <b>0.55-7.50</b> | <b>0.29</b> |

\*A p value < 0.05 is consider significant.

Three interaction models were tester 0=absence of the variable; 1= presence of the variable. Interaction terms are on bold.

| Variables                                     | Day 4 of BSI<br>Dead events =8 |           |         | Day 7 of BSI<br>Dead events =12 |           |         | Day 10 of BSI<br>Dead events =19 |           |         | Day 12 of BSI<br>Dead events =21 |           |         | Day 15 of BSI<br>Dead events =29 |            |         |
|-----------------------------------------------|--------------------------------|-----------|---------|---------------------------------|-----------|---------|----------------------------------|-----------|---------|----------------------------------|-----------|---------|----------------------------------|------------|---------|
|                                               | HR                             | 95% CI    | p value | HR                              | 95% CI    | p value | HR                               | 95% CI    | p value | HR                               | 95% CI    | p value | HR                               | 95% CI     | p value |
| Neutropenia, defined as <500 cells/microlitre | 3.26                           | 3.12-3.40 | <0 .001 | 3 .29                           | 3.23-3.34 | <0 .001 | 3 .36                            | 3.20-3.53 | <0 .001 | 3 .43                            | 3.23-3.64 | <0 .001 | 3 .82                            | 3.65-3.99  | <0 .001 |
| Urinary catheter                              | 1.83                           | 1.22-2.74 | 0 .003  | 1 .78                           | 1.20-2.63 | 0 .004  | 1.79                             | 1.23-2.59 | 0 .02   | 1.83                             | 1.29-2.60 | 0 .001  | 2 .00                            | 1.51-2.64  | <0 .001 |
| Microbiology failure                          | 2 .46                          | 1.33-4.56 | 0 .004  | 2 .49                           | 1.32-4.69 | 0 .005  | 2 .49                            | 1.32-4.68 | 0.005   | 2 .48                            | 1.34-4.64 | 0 .005  | 2 .49                            | 1.28-4.82  | 0 .007  |
| Pitt bacteremia score ≥2                      | 1.80                           | 1.42-2.27 | <0 .001 | 1 .77                           | 1.38-2.27 | <0 .001 | 1 .75                            | 1.34-2.30 | <0 .001 | 1 .74                            | 1.32-2.29 | <0 .001 | 1 .72                            | 1.27-2.34  | 0 .001  |
| <b>Time variable covariate</b>                |                                |           |         |                                 |           |         |                                  |           |         |                                  |           |         |                                  |            |         |
| VRE * time                                    | 1 .91                          | 1.01-3.61 | 0 .046  | 1 .68                           | 0.68-4.15 | 0 .260  | 1 .92                            | 0.74-4.99 | 0 .178  | 2 .48                            | 0.95-5.61 | 0 .066  | 7 .02                            | 2.61-18.90 | <0 .001 |

**Table S5. Estimated hazard ratios adjusted by time for VRE in-hospital mortality at five period**

A hospital specific random effect intercept was included in the model and was stratified by hospital unit of admission



**Table S6 Estimated hazard ratios (HR) for in-hospital mortality among individual with *Enterococcus faecium* BSI**

| Variable                                       | Univariate |            |         | Adjusted ‡ |           |         |
|------------------------------------------------|------------|------------|---------|------------|-----------|---------|
|                                                | HR         | 95% CI     | p value | HR         | 95% CI    | p value |
| Age; (years)                                   | 0.99       | 0.96-1.01  | 0.349   |            |           |         |
| Sex; Male                                      | 1.14       | 0.53-2.47  | 0.733   |            |           |         |
| Intensive care unit                            | 1.88       | 0.84-4.22  | 0.126   |            |           |         |
| Reason for admission (Medical)                 | 2.46       | 0.52-11.71 | 0.258   |            |           |         |
| Length of hospitalization (days)               | 0.98       | 0.96-1.00  | 0.057   | 0.98       | 0.97-0.99 | < 0.001 |
| Charlson score                                 | 0.79       | 0.61-1.04  | 0.093   | 0.90       | 0.59-1.37 | 0.614   |
| Bone marrow transplant                         | 1.61       | 0.66-3.93  | 0.292   |            |           |         |
| Immunosuppressive therapy                      | 0.56       | 0.26-1.21  | 0.143   |            |           |         |
| Previous hospitalization within a year         | 1.11       | 0.38-3.23  | 0.852   |            |           |         |
| Nursing home/long term facility                | 1.23       | 0.16-9.19  | 0.839   |            |           |         |
| Hemodialysis                                   | 0.79       | 0.30-2.07  | 0.633   |            |           |         |
| Recent surgical procedure                      | 1.02       | 0.33-3.17  | 0.966   |            |           |         |
| Steroid use                                    | 1.37       | 0.61-3.08  | 0.444   |            |           |         |
| Pitt bacteremia score ≥2                       | 1.75       | 0.81-3.79  | 0.154   |            |           |         |
| Neutropenia, defined as <500 cells/microlitre  | 1.46       | 0.67-3.17  | 0.34    |            |           |         |
| Central line placement                         | 2.57       | 0.88-7.46  | 0.084   | 2.74       | 1.76-4.27 | < 0.001 |
| Urinary catheter                               | 1.95       | 0.90-4.24  | 0.091   | 2.65       | 1.35-5.19 | 0.004   |
| Mechanical ventilation                         | 2.43       | 1.00-5.87  | 0.05    | 2.14       | 1.85-2.48 | < 0.001 |
| Polymicrobial infection                        | 1.40       | 0.59-3.33  | 0.446   |            |           |         |
| VRE BSI                                        | 1.72       | 0.48-6.22  | 0.405   |            |           |         |
| Infectious diseases Consult ∞                  | 0.99       | 0.23-4.23  | 0.987   |            |           |         |
| Central line infection                         | 0.91       | 0.41-1.99  | 0.806   |            |           |         |
| Abdominal/gastrointestinal infection           | 1.43       | 0.61-3.34  | 0.407   |            |           |         |
| Unknown/primary source                         | 0.83       | 0.33-2.08  | 0.689   |            |           |         |
| β-lactams†                                     | 0.58       | 0.14-2.49  | 0.465   |            |           |         |
| Daptomycin monotherapy                         | 0.71       | 0.33-1.54  | 0.386   |            |           |         |
| Daptomycin monotherapy dose (mg/kg;continuous) | 0.84       | 0.66-1.05  | 0.132   |            |           |         |
| Daptomycin plus other antibiotics              | 0.86       | 0.32-2.31  | 0.763   |            |           |         |
| Recurrence of BSI                              | 0.69       | 0.23-2.07  | 0.504   |            |           |         |
| Microbiological failure                        | 3.91       | 1.79-8.54  | 0.001   | 5.03       | 3.25-7.77 | < 0.001 |

§ Variables with a p value <0.1 were included into the adjusted models. ‡A hospital specific random effect intercept was included in the model and was stratified by hospital unit of admission. ∞ Defined as days from final report of blood culture to the day when the infectious diseases service was consulted. † β-lactams included ampicillin, ampicillin-sulbactam, ertapenem, amoxicillin-clavulanate, ceftriaxone or piperacillin/tazobactam.

**Table S7· DOOR analysis for the entire VENOUS I population**

| <b>Time</b>    | <b>DOOR Probability<br/>(95% Confidence Interval)</b> |
|----------------|-------------------------------------------------------|
| <b>4 days</b>  | 0·404 (0·332, 0·473)                                  |
| <b>7 days</b>  | 0·385 (0·311, 0·455)                                  |
| <b>10 days</b> | 0·396 (0·321, 0·468)                                  |
| <b>12 days</b> | 0·403 (0·328, 0·475)                                  |
| <b>15 days</b> | 0·413 (0·337, 0·486)                                  |

The Table shows the probability of a better clinical outcome within 4, 7, 10, 12, or 15 days from first positive blood culture for a randomly-selected patient with VRE vs· non-VRE BSI· Clinical outcomes ranked from best to worse are either 1) alive, 2) alive with microbiological failure/recurrent BSI, or 3) death· A probability of less than 50% – with a 95% confidence interval that excludes 50% – implies overall worse outcomes in VRE vs VSE BSI·

**Table S8. Estimated hazard ratios in-hospital mortality at five period after adjusting using the inverse of the propensity score**

| Variables                    | Day 4 of BSI<br>Dead events =8 |            |         | Day 7 of BSI<br>Dead events =12 |            |         | Day 10 of BSI<br>Dead events =19 |            |         | Day 12 of BSI<br>Dead events =21 |           |         | Day 15 of BSI<br>Dead events =29 |            |         |
|------------------------------|--------------------------------|------------|---------|---------------------------------|------------|---------|----------------------------------|------------|---------|----------------------------------|-----------|---------|----------------------------------|------------|---------|
|                              | HR                             | 95% CI     | p value | HR                              | 95% CI     | p value | HR                               | 95% CI     | p value | HR                               | 95% CI    | p value | HR                               | 95% CI     | p value |
| VRE                          | 2.92                           | 0.69-12.35 | 0.145   | 3.39                            | 0.97-11.85 | 0.055   | 3.39                             | 0.97-11.85 | 0.055   | 1.59                             | 0.61-4.19 | 0.344   | 1.16                             | 0.50-2.67  | 0.73    |
| Pitt bacteremia score<br>≥ 2 | 4.36                           | 0.60-31.79 | 0.147   | 2.33                            | 0.62-8.82  | 0.212   | 2.33                             | 0.62-8.82  | 0.212   | 1.76                             | 0.70-4.44 | 0.23    | 1.82                             | 0.78-4.22  | 0.164   |
| Urinary catheter             | 2.03                           | 0.57-7.26  | 0.277   | 3.91                            | 1.14-13.44 | 0.031   | 3.91                             | 1.14-13.44 | 0.031   | 6.44                             | 2.46-6.84 | <0.001  | 5.27                             | 2.10-13.21 | <0.001  |
| Microbiological<br>failure   | 8.42                           | 2.16-32.92 | 0.002   | 8.09                            | 2.74-23.87 | <0.001  | 8.09                             | 2.74-23.87 | <0.001  | 3.16                             | 1.25-7.99 | 0.015   | 3.24                             | 1.40-7.53  | 0.006   |

Figure S1. Flow-chart of patient inclusion in the VENOUS I study.

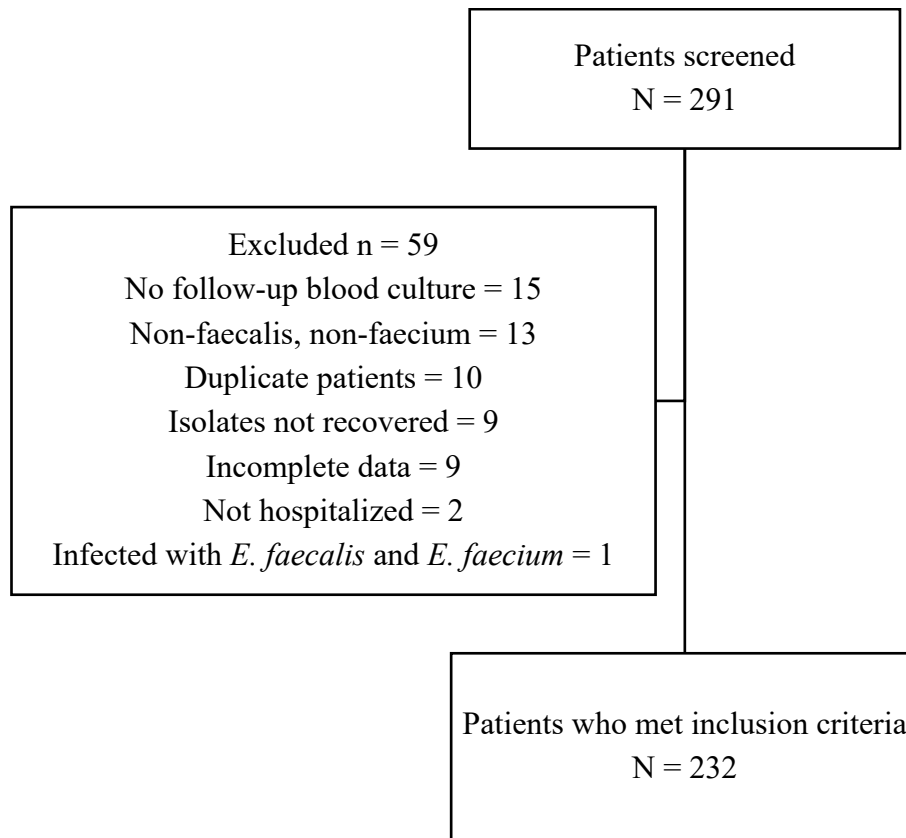

**Figure S2 Schoenfeld residuals test for variables selected from purposeful selection method**

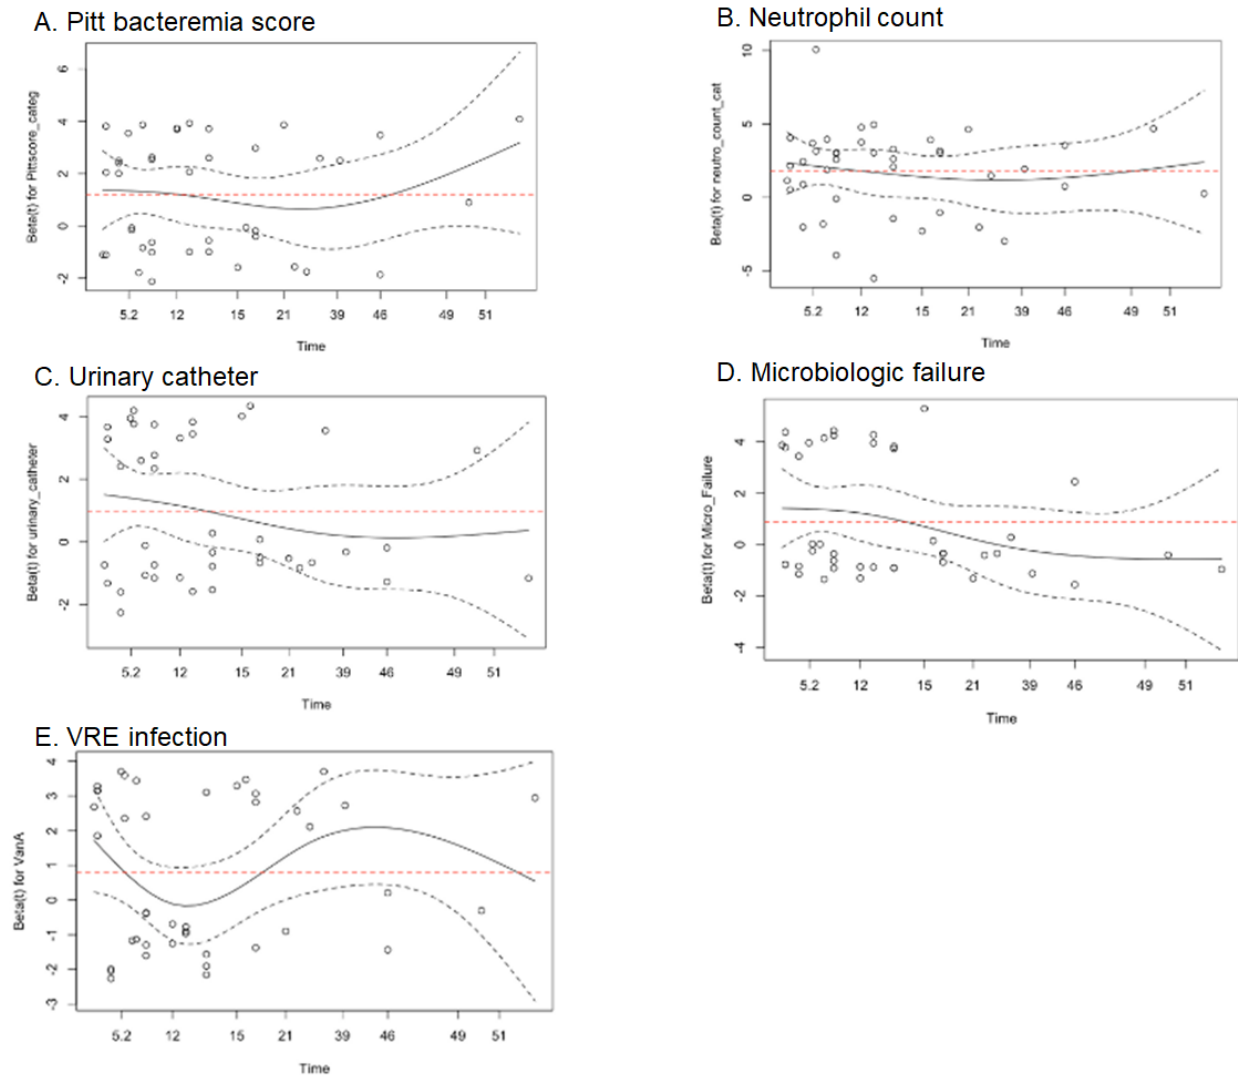

Using the variables selected from the purposeful selection method, VRE BSI (E) shows evidence that the Schoenfeld residuals are not linear and appear to vary over time. Panels A, B, C and D do not show violation of the proportional hazard assumption.

**Figure S3. Kaplan-Meier estimates.** Survival curve of patients with enterococcal BSI by species. Panel A described the over-all in-hospital mortality; dotted line shows that the effect on mortality was not uniform throughout the observation period. Panel B shows the survival curve at day 2 of bacteremia. Curves are compared using the log-rank test and a value  $<0.05$  was considered significant. Shade areas represents 95% confidence intervals

**A**

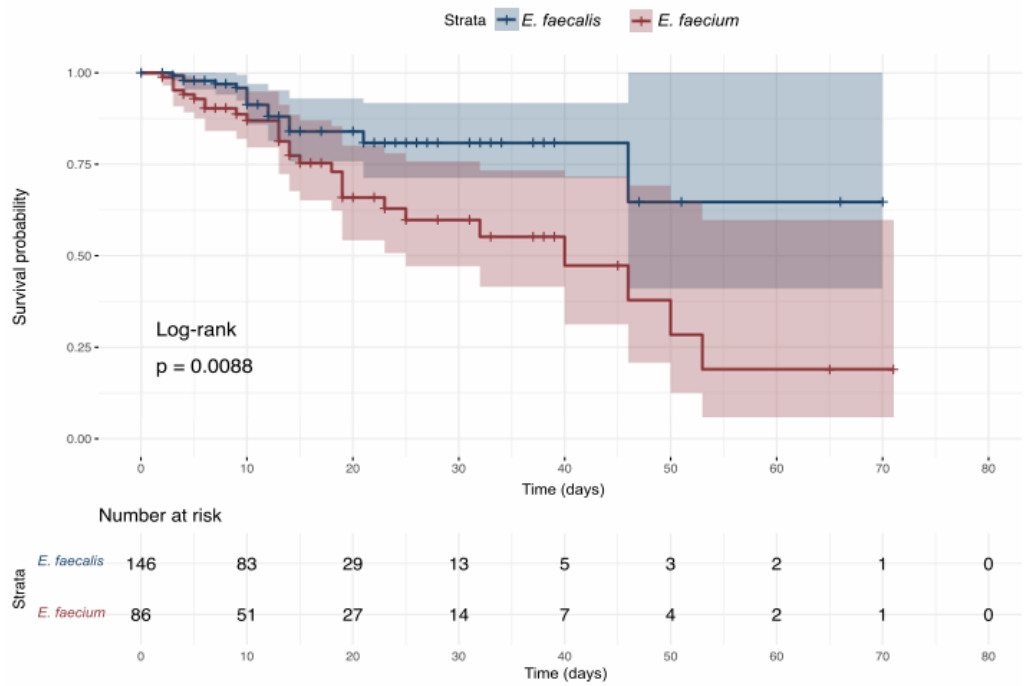

**B**

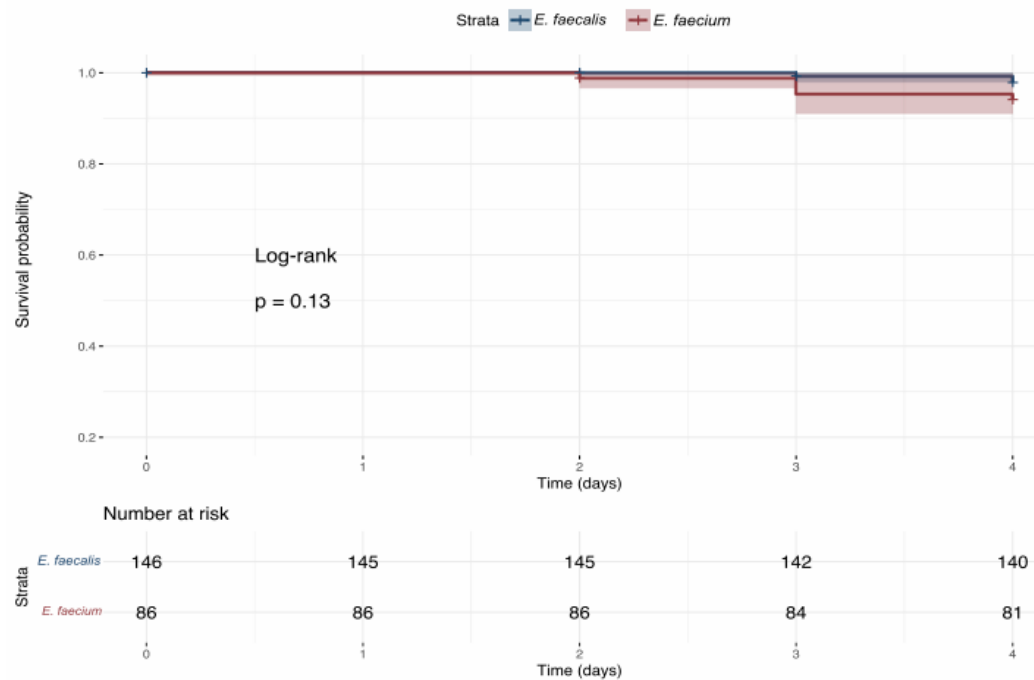

## Figure S4· *E. faecium* Clade A core genome SNP distance matrix heat map

*E. faecium* Clade A core genome SNP distance matrix heat map (n=79). SNP differences ranged from 0 (dark blue) to 10,263 (light yellow). Location of isolate collection is denoted by a color strip to the left of the matrix, and brackets indicate clusters of  $\geq 5$  isolates that differ by  $<20$  SNPs, indicating clonality. HC = Houston cancer center; DH = Detroit hospital; HH = Houston hospital

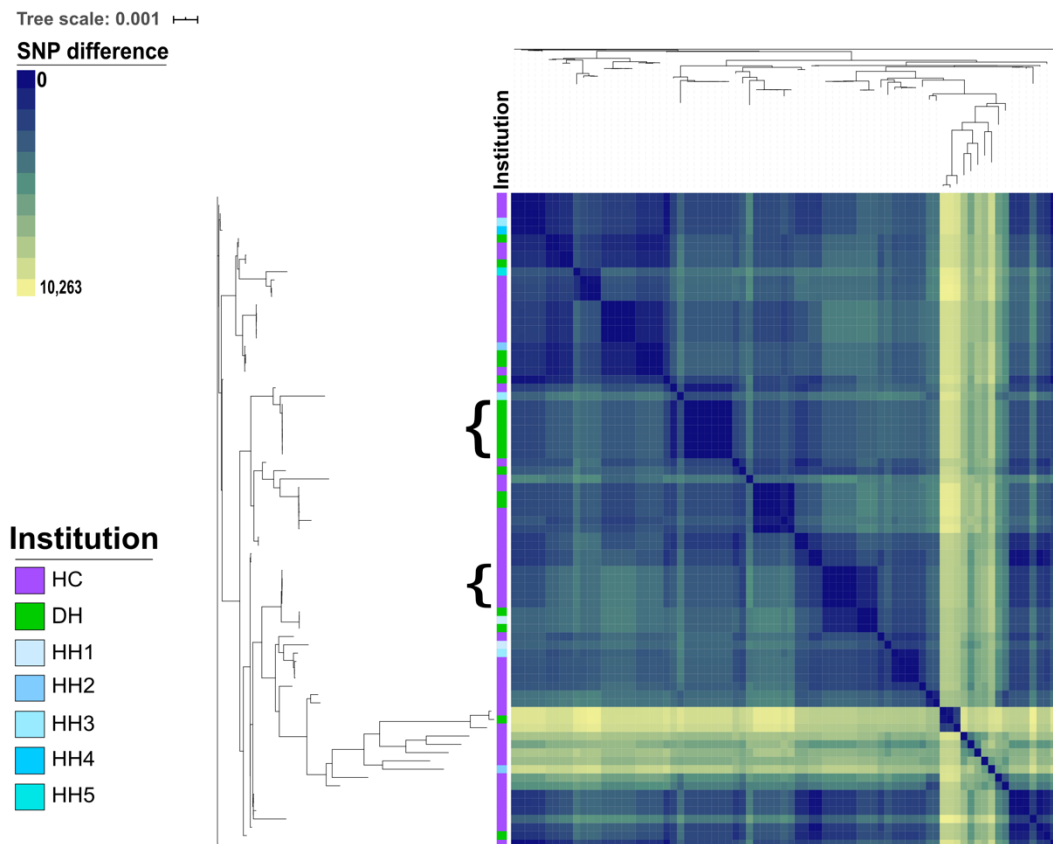

## Supplementary References

1. Bolger AM, Lohse M, Usadel B. Trimmomatic: a flexible trimmer for Illumina sequence data. *Bioinformatics* 2014; **30**: 2114-20.
2. Bankevich A, Nurk S, Antipov D et al. SPAdes: a new genome assembly algorithm and its applications to single-cell sequencing. *J Comput Biol* 2012; **19**: 455-77.
3. Seemann T. Prokka: rapid prokaryotic genome annotation. *Bioinformatics* 2014; **30**: 2068-9.
4. Katoh K, Misawa K, Kuma K et al. MAFFT: a novel method for rapid multiple sequence alignment based on fast Fourier transform. *Nucleic Acids Res* 2002; **30**: 3059-66.
5. Page AJ, Cummins CA, Hunt M et al. Roary: rapid large-scale prokaryote pan genome analysis. *Bioinformatics* 2015; **31**: 3691-3.
6. Stamatakis A. RAxML version 8: a tool for phylogenetic analysis and post-analysis of large phylogenies. *Bioinformatics* 2014; **30**: 1312-3.
7. Letunic I, Bork P. Interactive Tree Of Life (iTOL) v4: recent updates and new developments. *Nucleic Acids Res* 2019; **47**: W256-W9.
8. Gouliouris T, Coll F, Ludden C et al. Quantifying acquisition and transmission of *Enterococcus faecium* using genomic surveillance. *Nature microbiology* 2021; **6**: 103-11.
9. Camacho C, Coulouris G, Avagyan V et al. BLAST+: architecture and applications. *BMC Bioinformatics* 2009; **10**: 421.
10. Zankari E, Hasman H, Cosentino S et al. Identification of acquired antimicrobial resistance genes. *J Antimicrob Chemother* 2012; **67**: 2640-4.
11. Leavis HL, Willems RJ, Top J et al. High-level ciprofloxacin resistance from point mutations in *gyrA* and *parC* confined to global hospital-adapted clonal lineage CC17 of *Enterococcus faecium*. *J Clin Microbiol* 2006; **44**: 1059-64.
12. Yasufuku T, Shigemura K, Shirakawa T et al. Mechanisms of and risk factors for fluoroquinolone resistance in clinical *Enterococcus faecalis* isolates from patients with urinary tract infections. *J Clin Microbiol* 2011; **49**: 3912-6.
13. Marshall SH, Donskey CJ, Hutton-Thomas R et al. Gene dosage and linezolid resistance in *Enterococcus faecium* and *Enterococcus faecalis*. *Antimicrob Agents Chemother* 2002; **46**: 3334-6.
14. Mendes RE, Deshpande LM, Jones RN. Linezolid update: stable in vitro activity following more than a decade of clinical use and summary of associated resistance mechanisms. *Drug Resist Updat* 2014; **17**: 1-12.
15. Diaz L, Tran TT, Munita JM et al. Whole-genome analyses of *Enterococcus faecium* isolates with diverse daptomycin MICs. *Antimicrob Agents Chemother* 2014; **58**: 4527-34.
16. Munita JM, Panesso D, Diaz L et al. Correlation between mutations in *liaFSR* of *Enterococcus faecium* and MIC of daptomycin: revisiting daptomycin breakpoints. *Antimicrob Agents Chemother* 2012; **56**: 4354-9.
17. Arias CA, Panesso D, McGrath DM et al. Genetic basis for in vivo daptomycin resistance in enterococci. *N Engl J Med* 2011; **365**: 892-900.
18. Rios R, Reyes J, Carvajal LP et al. Genomic epidemiology of vancomycin-resistant *Enterococcus faecium* (VREfm) in Latin America: Revisiting the global VRE population structure. *Sci Rep* 2020; **10**: 5636.
19. Pietta E, Montealegre MC, Roh JH et al. *Enterococcus faecium* PBP5-S/R, the missing link between PBP5-S and PBP5-R. *Antimicrob Agents Chemother* 2014; **58**: 6978-81.
